# Supplementary material for: Genetic loci associated with prevalent and incident myocardial infarction and coronary heart disease in the Cohorts for Heart and Aging Research in Genomic Epidemiology (CHARGE) Consortium
Source: PLoS One. 2020 Nov 13;15(11):e0230035. doi: 10.1371/journal.pone.0230035 (PMC7665790; doi:10.1371/journal.pone.0230035)
Supplement: S2 Table — (XLSX) [file pone.0230035.s003.xlsx]

## Sheet: Sheet1
Table S2. Cohort specific summary statistics for low-frequency variant associated with prevalent MI
Outcome	Gene	Variant	Chromosome and Position	Function	MAF	Beta	SE	p-value	AGES			ARIC			CHS			FamHS			FHS			RS			SHIP
									Beta	SE	p-value	Beta	SE	p-value	Beta	SE	p-value	Beta	SE	p-value	Beta	SE	p-value	Beta	SE	p-value	Beta	SE	p-value
MI	PLCL1	rs988583	2:198987935	Intronic	1.64	0.587	0.1184	7.12e-07	1.22622	0.352202	0.000498449	0.575889	0.228626	0.0117716	0.359728	0.267908	0.179359	0.228179	0.593697	0.70073	0.32064	0.454085	0.480111	0.895497	0.310978	0.00398159	0.369201	0.286376	0.197323
